# Supplementary material
Source: PubMed Central journal article supplement (PMC3089542)

Supplemental Figure 2

Site-directed mutations were introduced into the *RNASEH2A* expression construct and the RNase H2 mutant complexes were purified as described under “EXPERIMENTAL PROCEDURES.”

Approximately 6  $\mu$ g of the indicated RNase H2 complex was subjected to 15% SDS-PAGE, and the gel was stained with Coomassie Brilliant Blue (lanes 2–10). The positions of migration of the molecular weight standards (lane 1) and RNase H2 subunits are indicated.

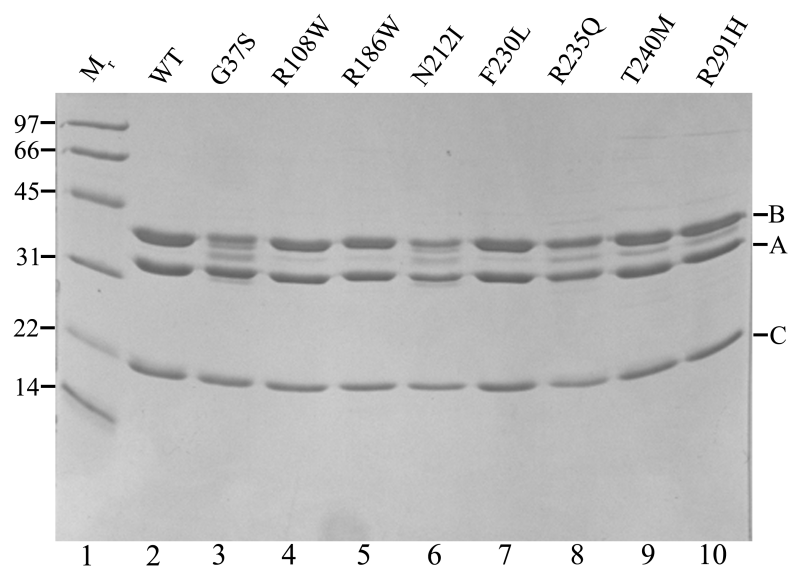

Supplement: supp_M111.228833_jbc.M111.228833-1.pdf [file supp_M111.228833_jbc.M111.228833-1.pdf]
